# Supplementary material for: Cancer-Associated Fibroblasts Suppress CD8+ T-cell Infiltration and Confer Resistance to Immune-Checkpoint Blockade
Source: Oxford University Press journal article supplement (doi:10.1158/0008-5472.can-21-4141), 2022-06-24
Supplement: can-21-4141_supplementary_figure_s2_suppsf2.pdf [file can-21-4141_supplementary_figure_s2_suppsf2.pdf]

Supplementary Fig. S2

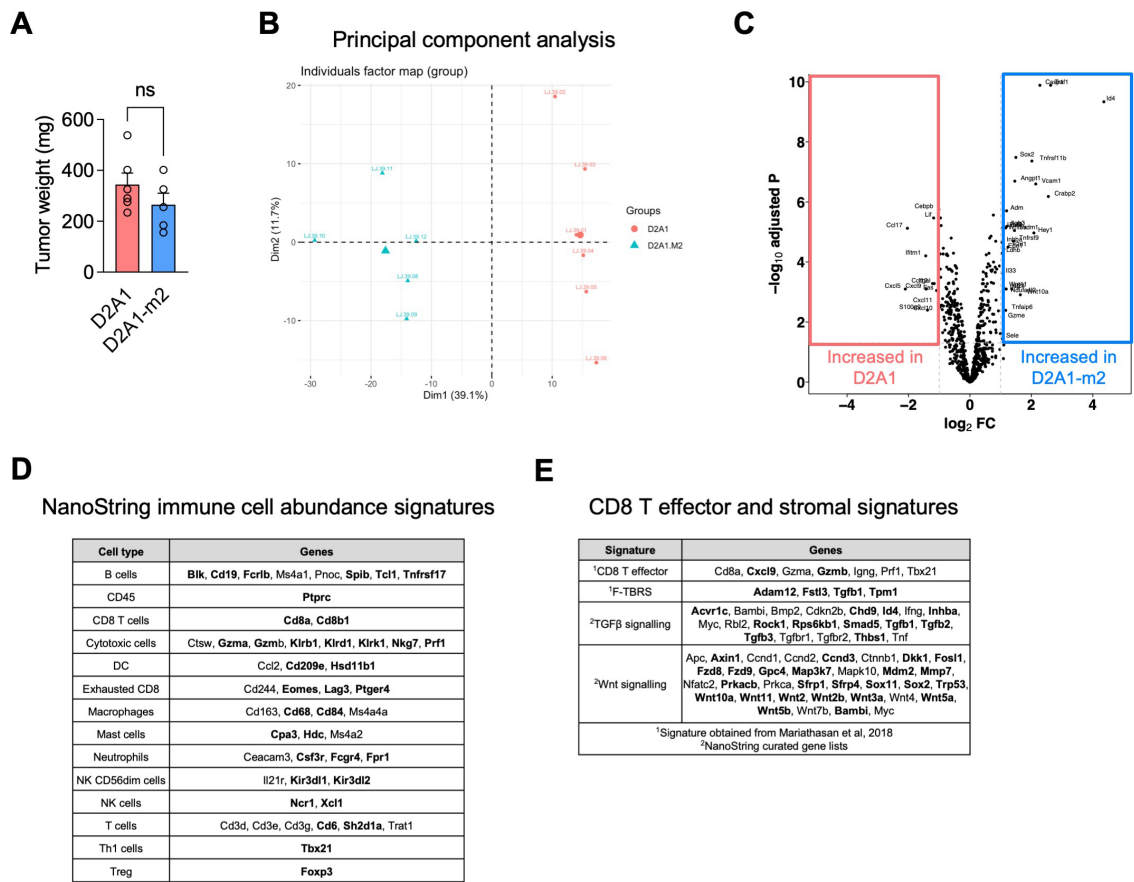

Supplementary Figure S2

NanoString profiling of D2A1 and D2A1-m2 tumors. Associated with Fig. 3. **A**, D2A1 and D2A1-m2 tumor weights at necropsy (mean values per mouse  $\pm$  SEM, unpaired  $t$ -test). **B**, Principal component analysis (PCA) plots of D2A1 and D2A1-m2 tumor NanoString data. Large symbols indicate centroids for each group. **C**, Volcano plot showing differentially expressed genes between D2A1 and D2A1-m2 tumors. Genes with an absolute  $\log_2$  fold change of  $>1$  and an adjusted  $P$  value of  $<0.05$  are considered significant. **D**, NanoString immune cell population abundance signatures were analyzed by hierarchical clustering on Spearman's correlation distance, followed by identification of optimal clusters using Silhouette score. Genes within signatures that were significantly correlated are indicated in bold in the panel lists. **E**, 'CD8 T effector' and stromal signatures were analyzed as described in panel D.
